# Supplementary material for: Same-session endoscopic diagnosis and symptom palliation in pancreato-biliary malignancies: Clinical impact of rapid on-site evaluation (ROSE)
Source: PubMed Central journal article supplement — Endosc Int Open. 2024 Feb 28;12(2):E297–306. doi: 10.1055/a-2251-3551 (PMC10901646; doi:10.1055/a-2251-3551), 2024-02-28
Supplement: 10-1055-a-2251-3551_22575825.pdf [file 10-1055-a-2251-3551_22575825.pdf]

## Supplementary material

## Same-session endoscopic diagnosis and symptoms' palliation in pancreato-biliary malignancies: clinical impact of Rapid-on-Site Evaluation

**Supplementary Statement 1:** List of collected variablesCharacteristics of included patients

- Age, years [IQR]
- Male sex, n (%)
- Primary disease, n (%)
  - Pancreatic cancer
  - Cholangiocarcinoma
  - Ampullary/Duodenal cancer
  - Metastatic lesion
  - Other malignancies
- Oncological Staging, n (%)
  - Resectable/Borderline resectable
  - Locally advanced
  - Metastatic
- Presenting Symptom, n (%)
  - Jaundice
  - GOO

Characteristics of sampling procedures

- Upfront procedure, n (%)
  - EUS
  - ERCP
  - ERCP after inadequate EUS
- First-session Adequacy, n (%)
  - EUS Adequacy
  - ERCP Adequacy
- Inadequate samples, n (%)
  - Final diagnosis obtained by, n
    - Subsequent EUS
    - Subsequent ERCP
    - Surgical specimen
    - Clinico-radiological follow up
- Adverse events during sampling, n (%)

Characteristics of therapeutic procedures

- Endoscopic Technical Success, n (%)
  - ERCP
  - EUS-CDS
  - EUS-HGS
  - EUS-GBD
  - EUS-GE
  - Enteral Stenting
- Rescue of endoscopic failure, n (%)

## Supplementary material

- PTBD
  - Surgery
- Adverse events, n (%)
  
- Procedural time, minutes [IQR]
- Hospital stay, days [IQR]
- Time to chemotherapy, days [IQR]

BMI: Body Mass Index; ERCP: Endoscopic Retrograde Cholangiopancreatography; EUS: Endoscopic Ultrasound; CDS: Choledocho-duodenostomy; GOO: Gastric Outlet Obstruction; GBD: Gallbladder Drainage; GE: Gastro-enterostomy; HGS: Hepatico-gastrostomy; IQR: Interquartile Range; LAMS: Lumen Apposing Metal Stents; PTBD: Percutaneous Transhepatic Biliary Drainage.

## Supplementary material

**Supplementary Table 1:** Sampling Adequacy according to Level of the Stenosis

| Variable                                                                                                        | Gastric Outlet Stenosis (n= 21) | Distal Biliary Stenosis (n= 272) | Proximal Biliary Stenosis (n= 30) | p-value     | p-value (distal versus proximal) |
|-----------------------------------------------------------------------------------------------------------------|---------------------------------|----------------------------------|-----------------------------------|-------------|----------------------------------|
| First attempted sampling modality, n (%)                                                                        |                                 |                                  |                                   | <0.001<br>* | 0.007*                           |
| EUS, n (%)                                                                                                      | 21 (100)                        | 270 (99.3)                       | 27 (90)                           |             |                                  |
| ERCP, n (%)                                                                                                     | 0 (0)                           | 2 (0.7)                          | 3 (10)                            |             |                                  |
|                                                                                                                 |                                 |                                  |                                   |             |                                  |
| Total Adequacy, n (%)                                                                                           | 21 (100)                        | 264 (97.1)                       | 27 (90%)                          | 0.09        | 0.05*                            |
| EUS Adequacy, n (%)                                                                                             | 21 (100)                        | 260/270 (96.3)                   | 23/27 (85)                        | 0.01*       | 0.01*                            |
| ERCP Adequacy, n (%)                                                                                            |                                 | 4/10 (40)                        | 4/6 (66.7)                        |             | 0.6                              |
|                                                                                                                 |                                 |                                  |                                   |             |                                  |
| ERCP: Endoscopic Retrograde Cholangiopancreatography; EUS: Endoscopic Ultrasound<br>* statistically significant |                                 |                                  |                                   |             |                                  |

## Supplementary material

**Supplementary Table 2:** Sampling Adequacy and Stenting according to Pancreatic versus Biliary Cancer

| Variable                                                                                                                                                                                                                                                                                      | Pancreatic Cancer<br>(n= 248) | Biliary Cancer<br>(n= 52) | p-value |
|-----------------------------------------------------------------------------------------------------------------------------------------------------------------------------------------------------------------------------------------------------------------------------------------------|-------------------------------|---------------------------|---------|
| First attempted sampling modality, n (%)                                                                                                                                                                                                                                                      |                               |                           | <0.001* |
| EUS                                                                                                                                                                                                                                                                                           | 248 (100)                     | 47 (90.4)                 |         |
| ERCP                                                                                                                                                                                                                                                                                          | 0                             | 5 (9.6)                   |         |
| Total Adequacy, n (%)                                                                                                                                                                                                                                                                         | 244 (98.4)                    | 47 (90.4)                 | 0.002*  |
| EUS Adequacy                                                                                                                                                                                                                                                                                  | 243/248 (97.9)                | 41/47 (87.2)              | <0.001* |
| ERCP Adequacy                                                                                                                                                                                                                                                                                 | 1/4 (25)                      | 6/10 (60)                 | 0.6     |
| Stenting <sup>§</sup> n (%)                                                                                                                                                                                                                                                                   |                               |                           | <0.001* |
| Plastic                                                                                                                                                                                                                                                                                       | 6 (3.1)                       | 16 (34.8)                 |         |
| PC-SEMS                                                                                                                                                                                                                                                                                       | 170 (88.5)                    | 23 (50)                   |         |
| FC-SEMS                                                                                                                                                                                                                                                                                       | 3 (1.6)                       | 1 (2.2)                   |         |
| UC-SEMS                                                                                                                                                                                                                                                                                       | 12 (6.2)                      | 6 (13)                    |         |
| ERCP: Endoscopic Retrograde Cholangiopancreatography; EUS: Endoscopic Ultrasound; FC: Fully Covered; PC: Partially Covered; SEMS: Self-Expandable Metal Stent; UC: Uncovered.<br><sup>§</sup> Amongst patients with jaundice and retrograde cannulation success<br>*statistically significant |                               |                           |         |

## Supplementary material

**Supplementary Table 3:** Biliary Stenting according to Level of the stenosis and Adequacy

| Variable                                                                                                               | Distal Biliary Stenosis  |                                                   | Proximal Biliary Stenosis |                                                   | p-value |
|------------------------------------------------------------------------------------------------------------------------|--------------------------|---------------------------------------------------|---------------------------|---------------------------------------------------|---------|
|                                                                                                                        | All Patients<br>(n= 272) | Patients with<br>inadequate<br>sampling<br>(n= 8) | All Patients<br>(n= 30)   | Patients with<br>inadequate<br>sampling<br>(n= 3) |         |
| Biliary Stenting, n (%)                                                                                                |                          |                                                   |                           |                                                   |         |
| <b>ERCP</b>                                                                                                            |                          |                                                   |                           |                                                   | <0.001* |
| Plastic stenting                                                                                                       | 10 (4.4)                 | 7                                                 | 14 (51.9)                 | 3                                                 |         |
| Partially Covered SEMS                                                                                                 | 197 (87.6)               | 0                                                 | 7 (25.9%)                 | 0                                                 |         |
| Fully Covered SEMS                                                                                                     | 5 (2.2)                  | 1                                                 | 0 (0)                     | 0                                                 |         |
| Uncovered SEMS                                                                                                         | 12 (5.3)                 | 0                                                 | 6 (22.2)                  | 0                                                 |         |
| <b>Therapeutic EUS</b>                                                                                                 |                          |                                                   |                           |                                                   |         |
| EUS-Choledocho-duodenostomy                                                                                            | 37                       | 0                                                 | 0                         | 0                                                 |         |
| EUS-Hepatico-gastrostomy                                                                                               | 4                        | 0                                                 | 1                         | 0                                                 |         |
| EUS-Gallbladder Drainage                                                                                               | 1                        | 0                                                 | 0                         | 0                                                 |         |
| ERCP: Endoscopic Retrograde Cholangiopancreatography; EUS: Endoscopic Ultrasound; SEMS : Self-Expandable Metal Stent . |                          |                                                   |                           |                                                   |         |
| *statistically significant                                                                                             |                          |                                                   |                           |                                                   |         |
